# Supplementary material for: Primary prevention of cardiovascular disease in women with a Mediterranean diet: systematic review and meta-analysis
Source: HighWire-hosted journal article supplement (doi:10.1136/heartjnl-2022-321930), 2023-03-14
Supplement: heartjnl-2022-321930supp002_data_supplement.pdf [file heartjnl-2022-321930supp002_data_supplement.pdf]

# Higher Mediterranean Diet Adherence Associated with Lower Cardiovascular Disease (CVD) and Death Specifically in Women

Mediterranean diet characterised by minimally processed plant foods, extra-virgin olive oil, and lean proteins

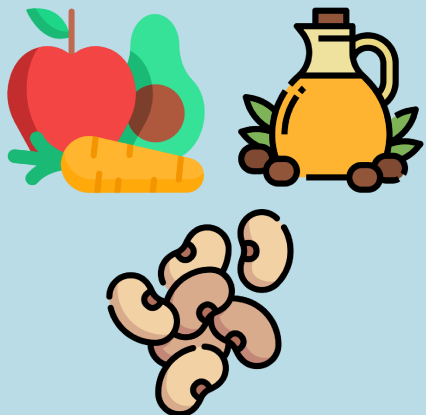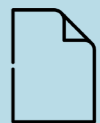

16 prospective cohort studies included in meta-analysis

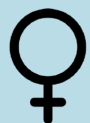

722,495 female participants

In women, higher Mediterranean diet adherence had a beneficial effect on CVD and death

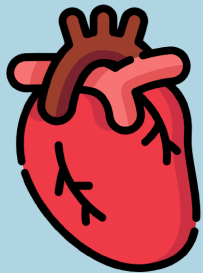

HR 0.76 (CI 0.72-0.81)  
I<sup>2</sup>=39% for CVD

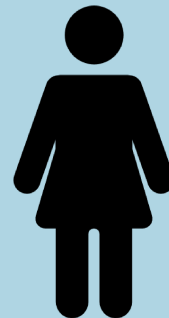

HR 0.77 (CI 0.74-0.80)  
I<sup>2</sup>=21% for total mortality

In women, higher Mediterranean diet adherence had a beneficial effect on coronary heart disease (CHD), but did not reach statistical significance for stroke

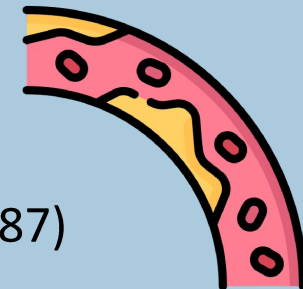

HR 0.75 (CI 0.65-0.87)  
I<sup>2</sup>=21% for CHD

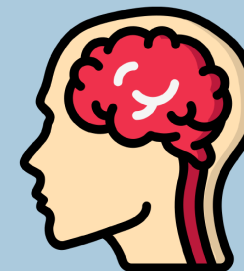

HR 0.87 (CI 0.76-1.01)  
I<sup>2</sup>=0% for stroke
